# Supplementary material for: An extended architecture built upon the double-Dawson-type polyoxoanion
Source: Royal Society of Chemistry journal article supplement (doi:10.1039/b813184h), 2009-01-01
Supplement: b813184h.pdf [file b813184h.pdf]

## Supporting Information

### An Extended Architecture built upon the Double-Dawson-Type Polyoxoanion

Shuang Yao, Zhiming Zhang, Yangguang Li\* and Enbo Wang\*

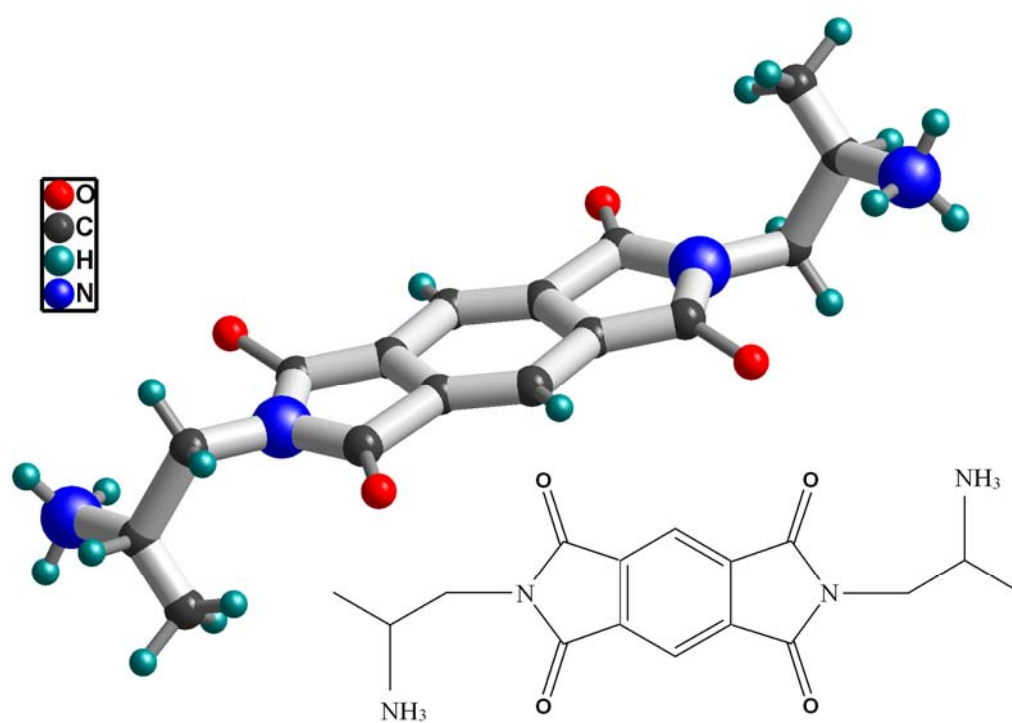

**Fig. S1.** Ball-and-stick representation of the structure of H<sub>2</sub>L.

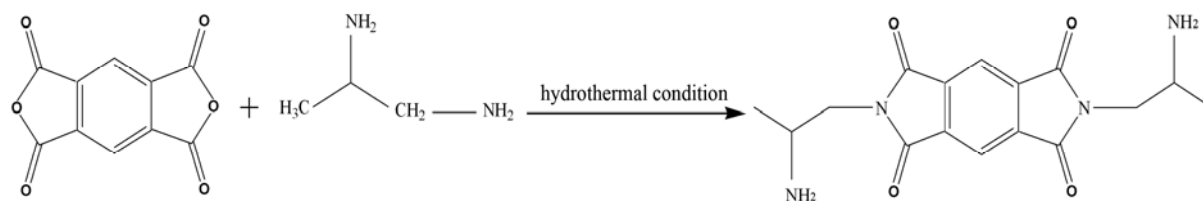

**Fig. S2.** Chemical equation shows the formation process of **L**.

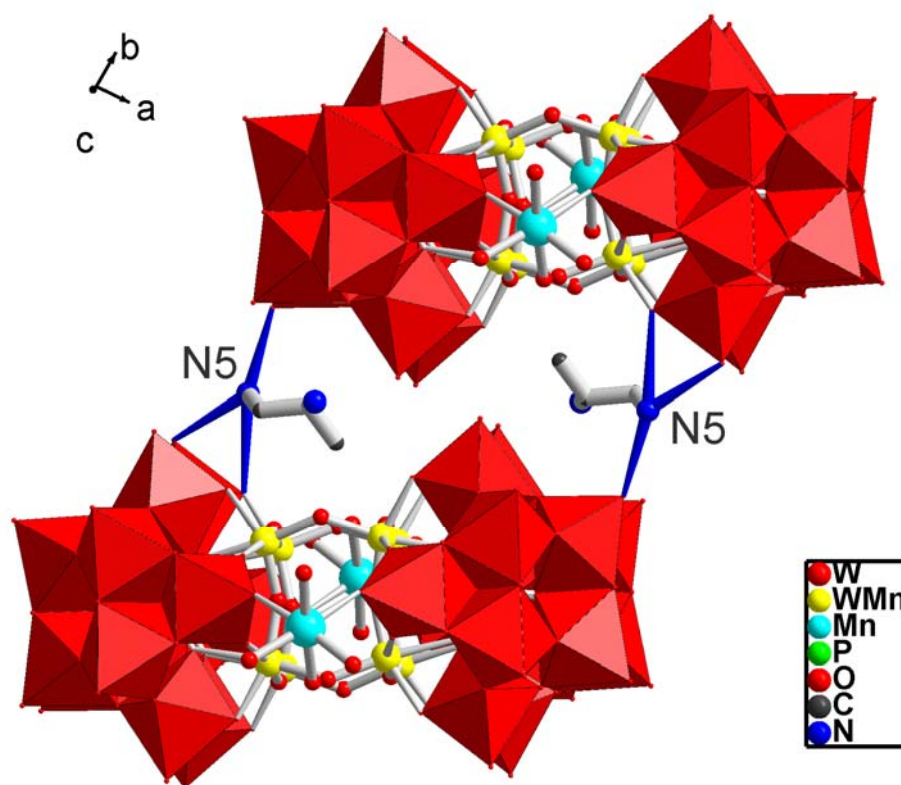

**Fig. S3.** View of coordination modes of hydrogen bonds between enMe molecules and  $[(\text{W}_4\text{Mn}_4\text{O}_{12})(\text{P}_2\text{W}_{14}\text{O}_{54})_2]^{20-}$  subunit in **1**. Hydrogen atoms are omitted for clarity.

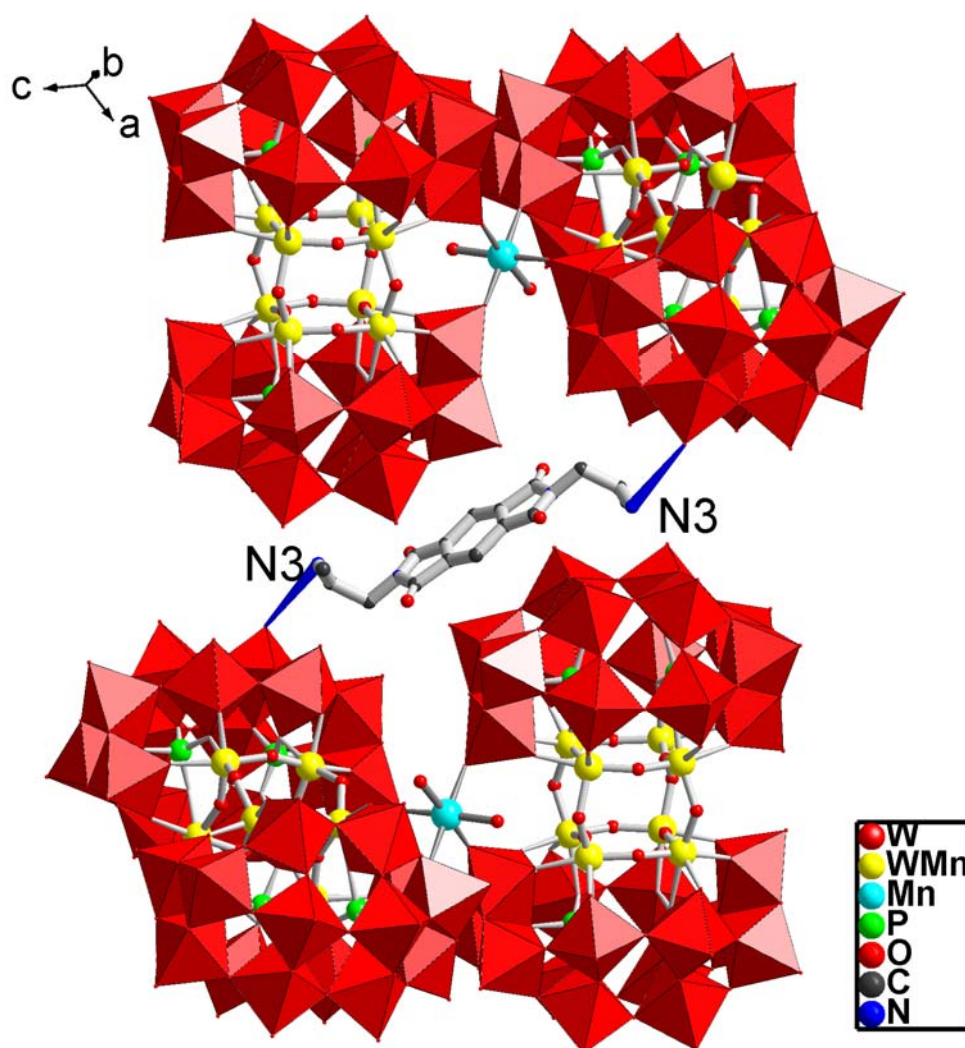

**Fig. S4.** View of coordination modes of hydrogen bonds between  $H_2L$  and  $[(W_4Mn_4O_{12})(P_2W_{14}O_{54})_2]^{20-}$  subunit in **1**. Hydrogen atoms are omitted for clarity.

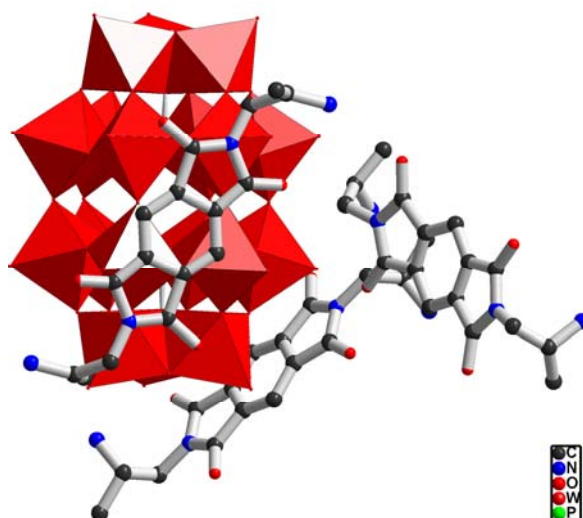

**Fig. S5.** Polyhedral and ball-and-stick view of unit cell in compound **2**.

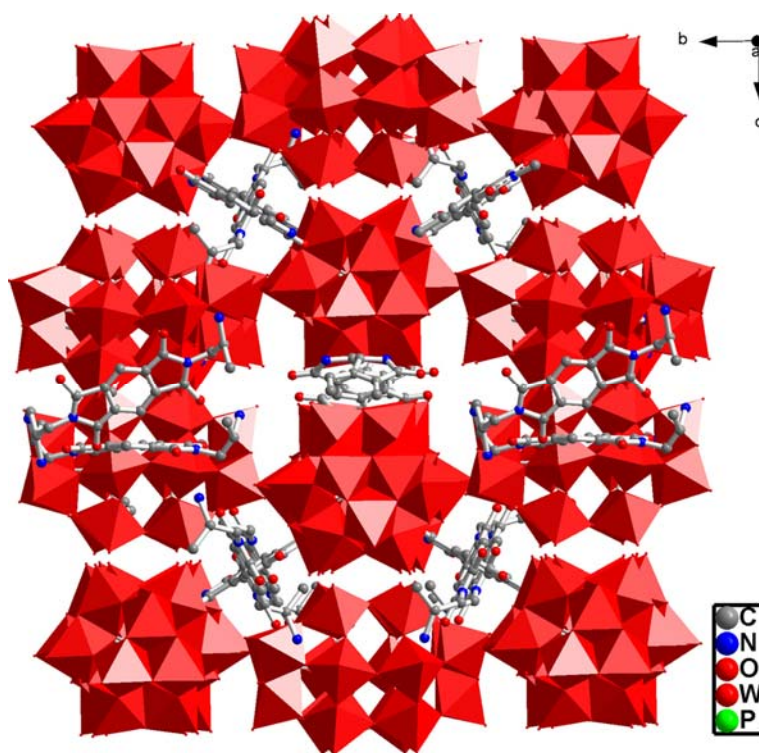

**Fig. S6.** View of the 3D framework of **2** along *a* axis. Hydrogen atoms are omitted for clarity.

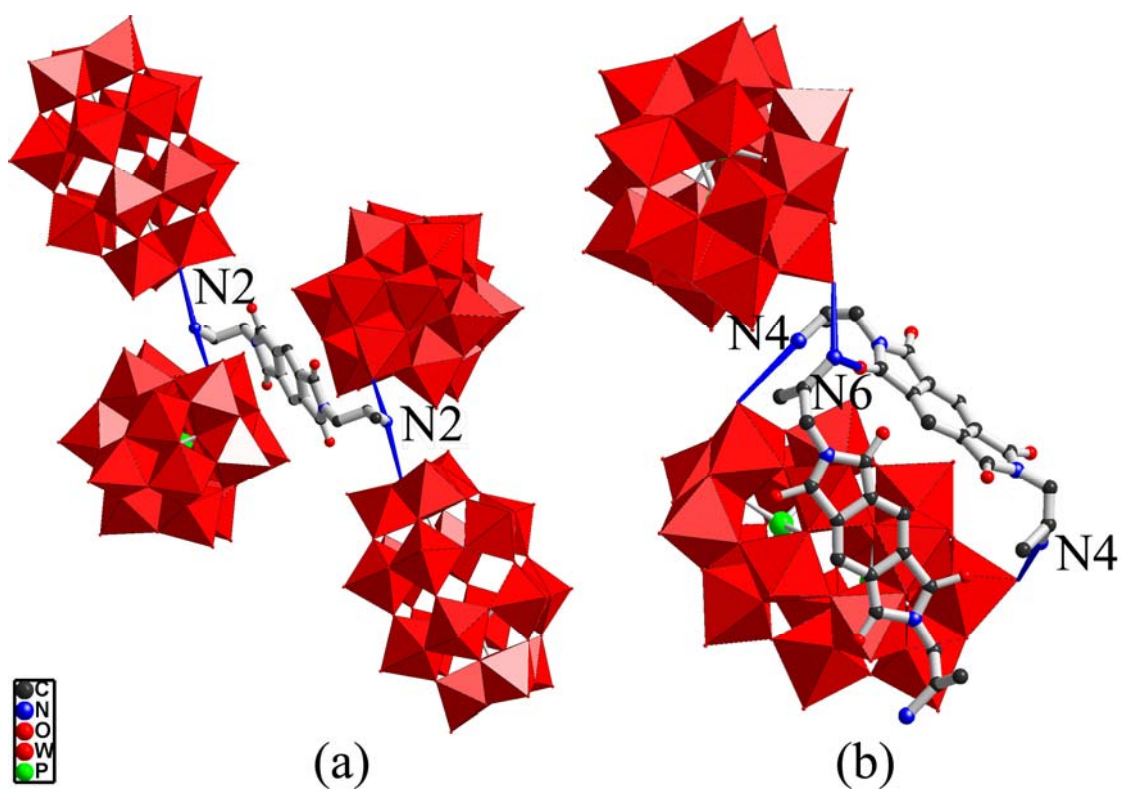

**Fig. S7.** View of coordination modes of hydrogen bonds between H<sub>2</sub>L and H<sub>2</sub>L ligand, H<sub>2</sub>L ligand and [P<sub>2</sub>W<sub>18</sub>O<sub>62</sub>]<sup>6-</sup> subunit in **2**. Hydrogen atoms are omitted for clarity.

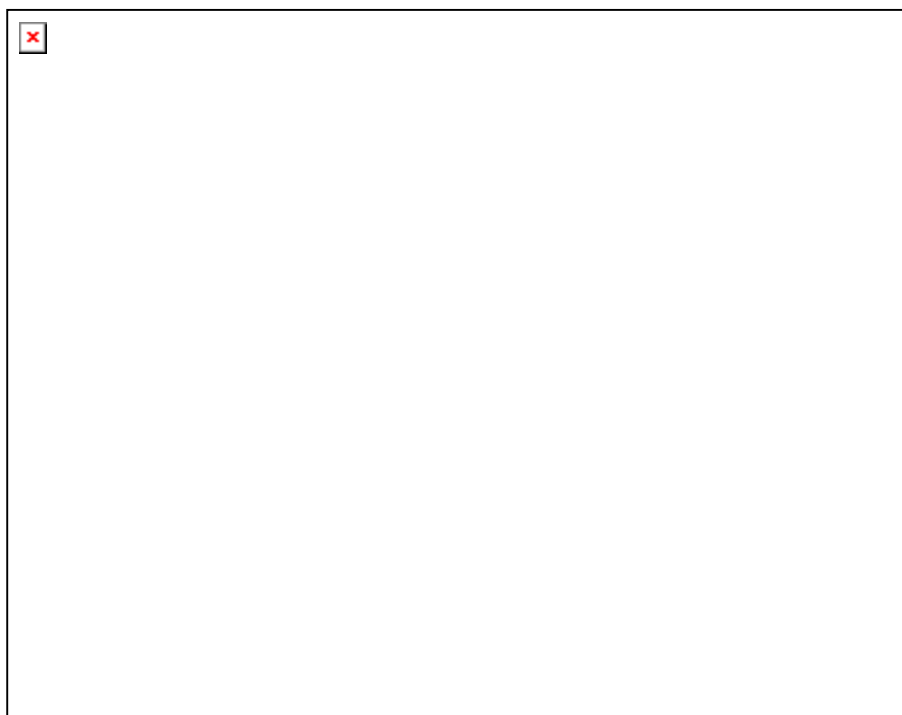

**Fig. S8.** The IR spectrum of **1**.

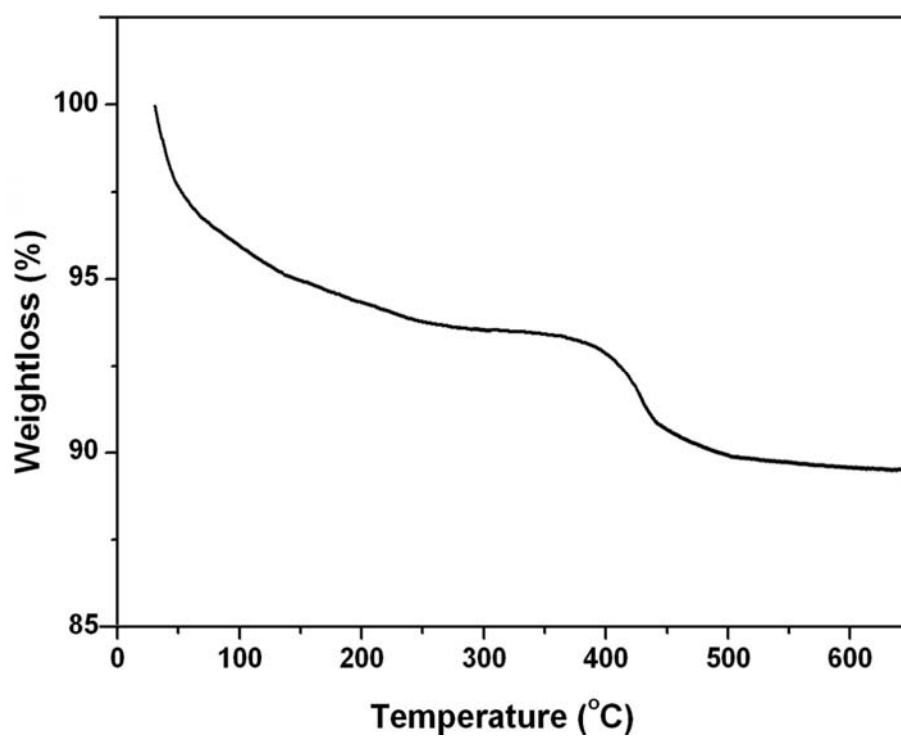

**Fig. S9.** TGA curve of **1**.
